# Supplementary material for: Crimean–Congo Hemorrhagic Fever Virus Past Infections Are Associated with Two Innate Immune Response Candidate Genes in Dromedaries
Source: MDPI journal article supplement (doi:10.3390/cells11010008), 2021-12-21
Supplement: s1 [file s1]

# Supplementary Materials for

## Crimean-Congo hemorrhagic fever virus past infections are associated with two innate immune response candidate genes in dromedaries

S. Lado<sup>1,2</sup>, J. Futas<sup>3,4</sup>, Martin Plasil<sup>3,4</sup>, T. Loney<sup>5</sup>, P. Weidinger<sup>6</sup>, J. V. Camp<sup>6,7</sup>, J. Kolodziejek<sup>6</sup>, D. O. Kannan<sup>8</sup>, P. Horin<sup>3,4</sup>, N. Nowotny<sup>5,6</sup> and P. A. Burger<sup>1,\*</sup>

<sup>1</sup> Research Institute of Wildlife Ecology, Department of Interdisciplinary Life Sciences, University of Veterinary Medicine Vienna, Vienna, Austria; sara.lado@meduniwien.ac.at (S.L.); pamelaburger@vetmeduni.ac.at (P.A.B.)

<sup>2</sup> Division of Infectious Diseases and Tropical Medicine, Department of Medicine I, Medical University of Vienna, Vienna, Austria

<sup>3</sup> Department of Animal Genetics, University of Veterinary Sciences Brno, Brno, Czech Republic; plasilma@vfu.cz (M.P.); jfutas@vfu.cz (J.F.); horin@ics.muni.cz (P.H.)

<sup>4</sup> RG Animal Immunogenomics, CEITEC VETUNI Brno, Brno, Czech Republic

<sup>5</sup> College of Medicine, Mohammed Bin Rashid University of Medicine and Health Sciences, Dubai, United Arab Emirates; tom.loney@mbru.ac.ae (T.L.); Norbert.Nowotny@vetmeduni.ac.at (N.N.)

<sup>6</sup> Viral Zoonoses, Emerging and Vector-Borne Infections Group, Institute of Virology, University of Veterinary Medicine Vienna, Vienna, Austria; Pia.Weidinger@vetmeduni.ac.at (P.W.); Jeremy.Camp@meduniwien.ac.at (J.V.C.); Jolanta.Kolodziejek@vetmeduni.ac.at (J.K.)

<sup>7</sup> Center for Virology, Medical University of Vienna, Vienna, Austria

<sup>8</sup> Al Ain City Municipality, Al Ain, United Arab Emirates; Dafalla.Ahmed@aam.gov.ae (D.O.K.)

\* Correspondence: pamelaburger@vetmeduni.ac.at, +431250777141

### This PDF file includes:

Figures S1, S2 and S3

Tables S1, S2, S3 and S4

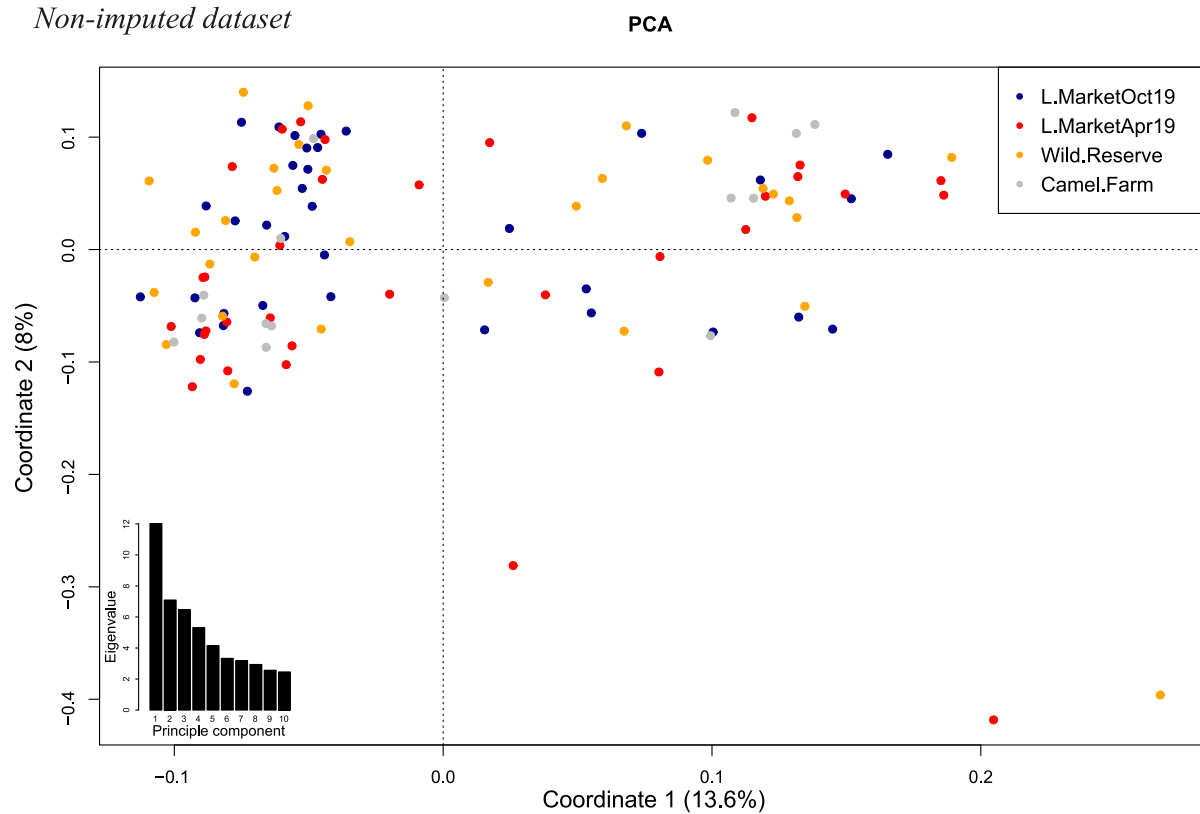

**Figure S1. Principal Component Analysis of the population structure at three collection sites over two sampling periods for the non-imputed dataset.** Variation explained by PC1 and PC2 are depicted in percentages. Individual animals are plotted on the first two principal components, coloured by sampling site (livestock market [“L.Market”], over two sampling periods (April and October 2019, dark and light blue, respectively); Dubai Desert Conservation Reserve [“Wild.Reserve”], dark red; and a Bedouin camel farm [“Camel.Farm”], pink). The inset shows a barplot of the eigenvalues for the first 10 principal components.

### ***FCAR* (chr9: 73807328 - 73825701)**

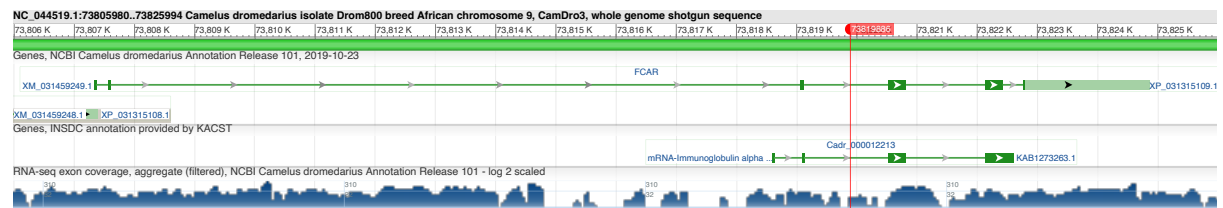

### ***CLEC2B* (chr34: 15807876 - 15823606)**

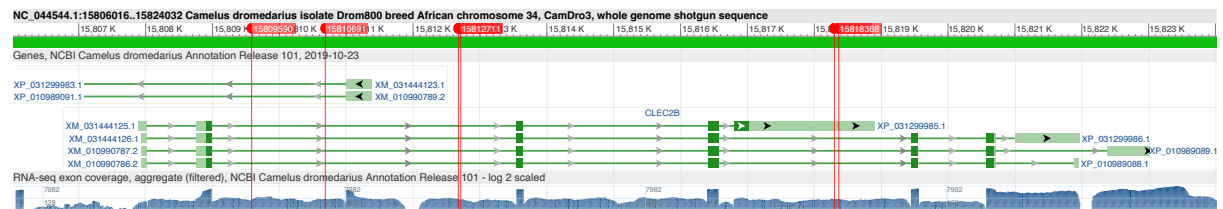

**Figure S2. Significant SNP positions in the intronic regions of *FCAR* and *CLEC2B*.** Significant SNPs (Table 1) are highlighted in red. The position numbering follows the dromedary reference genome CamDro3 (GCF\_000803125.2).

a) Total dataset  
(three first PC)

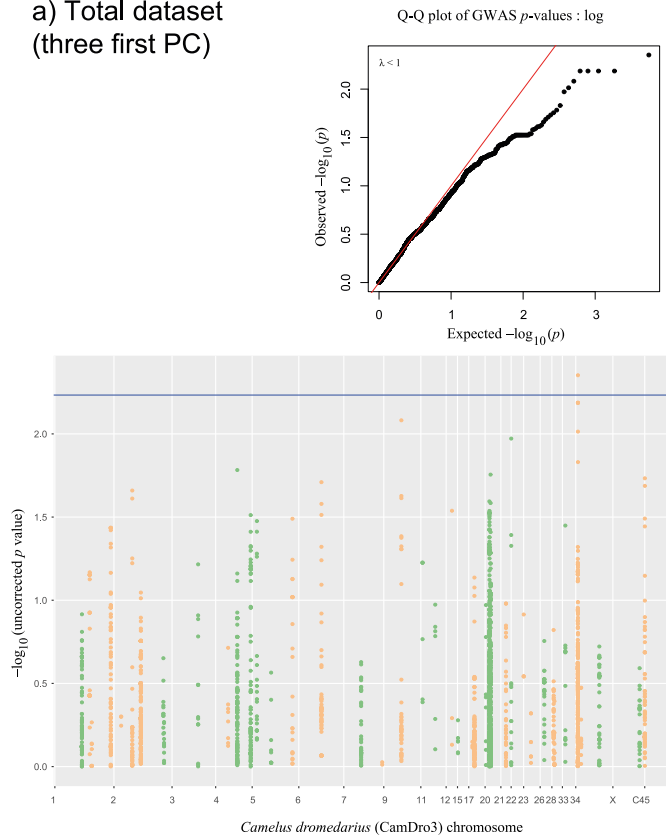

| Chr      | Position | Gene     | $p$ -value |
|----------|----------|----------|------------|
| 34       | 15810691 | CLEC2B   | 0.0044*    |
| 34       | 15812682 | CLEC2B   | 0.0065     |
| 34       | 15812711 | CLEC2B   | 0.0065     |
| 34       | 15818303 | CLEC2B   | 0.0065     |
| 34       | 15818368 | CLEC2B   | 0.0065     |
| 9        | 73819886 | FCAR     | 0.0083     |
| 34       | 15809590 | CLEC2B   | 0.0097     |
| 22       | 298936   | GZMM     | 0.0107     |
| 34       | 15817796 | CLEC2B   | 0.0148     |
| 5        | 8553067  | PTPN4    | 0.0165     |
| 20       | 23101961 | HLA-A-24 | 0.0176     |
| Contig45 | 331563   | DDX58    | 0.0185     |
| 6        | 95025252 | TRAF3    | 0.0195     |
| Contig45 | 338479   | DDX58    | 0.0205     |
| 2        | 95084365 | TLR10    | 0.0219     |
| 9        | 73820233 | FCAR     | 0.0236     |
| 9        | 73819171 | FCAR     | 0.0243     |
| 2        | 95081295 | TLR10    | 0.0245     |
| 20       | 20684519 | HLA-DPA1 | 0.0255     |
| 20       | 23101931 | HLA-A-24 | 0.0261     |

b) Non-imputed dataset  
(four first PC)

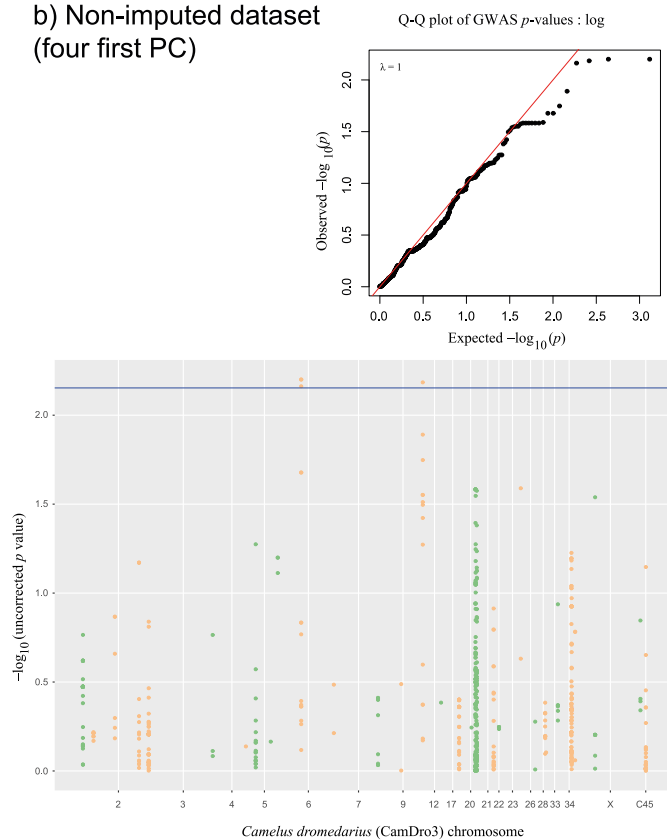

| Chr | Position | Gene       | $p$ -value |
|-----|----------|------------|------------|
| 6   | 34079760 | GZMB       | 0.0063*    |
| 6   | 34079763 | GZMB       | 0.0063*    |
| 9   | 73819886 | FCAR       | 0.0065*    |
| 6   | 34079992 | GZMB       | 0.0069*    |
| 9   | 73820233 | FCAR       | 0.0129     |
| 9   | 73819171 | FCAR       | 0.0179     |
| 6   | 34083198 | GZMB       | 0.0210     |
| 6   | 34084005 | GZMB       | 0.0210     |
| 23  | 30846690 | IL10       | 0.0258     |
| 20  | 20831045 | HLA-DOB    | 0.0261     |
| 20  | 20831074 | HLA-DOB    | 0.0261     |
| 20  | 20832742 | INTERGENIC | 0.0261     |
| 20  | 20834325 | INTERGENIC | 0.0261     |
| 20  | 20834645 | INTERGENIC | 0.0261     |
| 20  | 20834956 | INTERGENIC | 0.0261     |
| 20  | 23102048 | HLA-A-24   | 0.0266     |
| 9   | 73820723 | FCAR       | 0.0281     |
| 9   | 73820724 | FCAR       | 0.0281     |
| 20  | 21033478 | HLA-DRB1   | 0.0284     |
| 37  | 27539160 | INTERGENIC | 0.0289     |

**Figure S3. Manhattan and QQ plot for the total dataset and non-imputed dataset.** Top 20 most significant SNPs are presented. FDR corrected thresholds are represented in blue in the Manhattan plot, and  $p$ -values with \* are significant after FDR thresholds. a) Total dataset; b) non-imputed dataset. C45 corresponds to Contig45, an unplaced scaffold.

## Supplementary tables

**Table S1. Sample information and phenotype characterization for virus shedding (RT-qPCR) and antibody prevalence (ELISA) from blood sera.**

| Original code | Lab code | Sampling place              | Sex (M/F) | Age (yr) approx. | Chip ID         | CCHFV RT-qPCR JVC | CCGFV ELISA | Samples used in association tests |
|---------------|----------|-----------------------------|-----------|------------------|-----------------|-------------------|-------------|-----------------------------------|
| 1             | Drom1458 | Livestock Market, UAE Oct19 | M         | 2                | 900182001697895 | neg               | pos. 170.5  | X                                 |
| 2             | Drom1459 | Livestock Market, UAE Oct19 | M         | 4 m              | NO CHIP INFO    | neg               | neg. 4.9    | X                                 |
| 3             | Drom1460 | Livestock Market, UAE Oct19 | M         | 2                | 900215000003532 | neg               | pos. 227.8  | X                                 |
| 4             | Drom1461 | Livestock Market, UAE Oct19 | -         | -                | 900111881027297 | neg               | pos. 70.2   |                                   |
| 5             | Drom1462 | Livestock Market, UAE Oct19 | M         | 1                | 900057600126219 | neg               | pos. 143.0  | X                                 |
| 6             | Drom1463 | Livestock Market, UAE Oct19 | M         | 3 m              | NO CHIP INFO    | neg               | pos. 192.4  | X                                 |
| 7             | Drom1464 | Livestock Market, UAE Oct19 | M         | 2 m              | NO CHIP INFO    | neg               | weak 38.7   |                                   |
| 8             | Drom1465 | Livestock Market, UAE Oct19 | F         | 3                | 900057600122200 | neg               | pos. 153.5  | X                                 |
| 9             | Drom1466 | Livestock Market, UAE Oct19 | F         | 3                | 900215000005008 | neg               | pos. 118.5  | X                                 |
| 10            | Drom1467 | Livestock Market, UAE Oct19 | F         | 5                | 985007841277728 | neg               | pos. 222.5  | X                                 |
| 11            | Drom1468 | Livestock Market, UAE Oct19 | F         | 6                | 784010050031772 | neg               | pos. 228.9  | X                                 |
| 13            | Drom1470 | Livestock Market, UAE Oct19 | F         | 1                | 784010050046584 | neg               | pos. 184.6  | X                                 |
| 14            | Drom1471 | Livestock Market, UAE Oct19 | F         | 6                | 992001000331305 | neg               | pos. 230.1  | X                                 |
| 23            | Drom1480 | Livestock Market, UAE Oct19 | F         | 6                | 784010050267117 | neg               | pos. 198.1  | X                                 |
| 25            | Drom1482 | Livestock Market, UAE Oct19 | F         | 3                | 900057600121775 | neg               | pos. 236.2  | X                                 |
| 27            | Drom1484 | Livestock Market, UAE Oct19 | F         | 6 m              | 784010050465212 | neg               | pos. 195.9  | X                                 |
| 28            | Drom1485 | Livestock Market, UAE Oct19 | M         | 5 m              | NO CHIP INFO    | neg               | pos. 176.7  | X                                 |
| 29            | Drom1486 | Livestock Market, UAE Oct19 | M         | 6 m              | NO CHIP INFO    | neg               | pos. 180.3  | X                                 |
| 31            | Drom1488 | Livestock Market, UAE Oct19 | M         | 2                | 908182001493742 | neg               | pos. 217.7  | X                                 |
| 32            | Drom1489 | Livestock Market, UAE Oct19 | M         | 2                | 991001002574519 | neg               | pos. 205.1  | X                                 |
| 35            | Drom1492 | Livestock Market, UAE Oct19 | F         | 6                | 900057600126791 | neg               | pos. 204.1  | X                                 |
| 37            | Drom1494 | Livestock Market, UAE Oct19 | F         | 5                | 968000002916753 | neg               | pos. 216.0  | X                                 |
| 38            | Drom1495 | Livestock Market, UAE Oct19 | M         | 6                | 985007841229562 | neg               | pos. 257.7  | X                                 |
| 39            | Drom1496 | Livestock Market, UAE Oct19 | F         | 6                | 784010050348103 | neg               | pos. 147.4  | X                                 |
| 42            | Drom1499 | Livestock Market, UAE Oct19 | F         | 3                | 784019000006947 | neg               | neg. 12.8   | X                                 |
| 43            | Drom1500 | Livestock Market, UAE Oct19 | F         | 6                | 985007841219484 | neg               | pos. 216.5  | X                                 |
| 45            | Drom1502 | Livestock Market, UAE Oct19 | M         | 5                | 985007841209387 | neg               | pos. 170.2  | X                                 |
| 47            | Drom1504 | Livestock Market, UAE Oct19 | F         | 6                | 784010050073661 | neg               | pos. 174.2  | X                                 |
| 48            | Drom1505 | Livestock Market, UAE Oct19 | F         | 5                | 784019000006158 | neg               | pos. 186.8  | X                                 |
| 51            | Drom1508 | Livestock Market, UAE Oct19 | F         | 2                | 985007841357609 | neg.              | neg. 9.9    | X                                 |
| 54            | Drom1511 | Livestock Market, UAE Oct19 | M         | 2                | 900057600121585 | neg               | pos. 233.2  | X                                 |

|       |          |                               |   |     |                 |                |                   |   |
|-------|----------|-------------------------------|---|-----|-----------------|----------------|-------------------|---|
| 56    | Drom1513 | Livestock Market, UAE Oct19   | F | 2   | 784010050551133 | pos. 37.3      | neg. 8.0          |   |
| 69    | Drom1526 | Livestock Market, UAE Oct19   | F | 6   | 784010050079111 | neg            | pos. 224.6        | X |
| 72    | Drom1529 | Livestock Market, UAE Oct19   | - | -   | 991001001739927 | neg            | pos. 222.7        |   |
| 79    | Drom1536 | Livestock Market, UAE Oct19   | F | 6   | 784010050079139 | neg            | pos. 186.2        | X |
| 85    | Drom1542 | Livestock Market, UAE Oct19   | F | 4   | 784010050140963 | neg            | pos. 217.4        | X |
| 87    | Drom1544 | Livestock Market, UAE Oct19   | M | 1   | 900057600121595 | neg.           | neg. 7.0          | X |
| 88    | Drom1545 | Livestock Market, UAE Oct19   | - | 6 m | NO CHIP INFO    | neg.           | neg. 28.5         | X |
| 90    | Drom1547 | Livestock Market, UAE Oct19   | F | 6   | 784010050294118 | neg            | pos. 223.2        | X |
| NSB5  | Drom1823 | Livestock Market, UAE April19 | M | 2   | 900111881038114 | neg.           | neg. 3.1          | X |
| NSB8  | Drom1826 | Livestock Market, UAE April19 | M | 2   | 900111881038106 | neg.           | neg. 3.3          | X |
| NSB10 | Drom1827 | Livestock Market, UAE April19 | F | 2   | 784010050550508 | neg.           | pos. 153.9        | X |
| NSB11 | Drom1828 | Livestock Market, UAE April19 | M | 2   | 784010050550691 | neg.           | pos. 189.3        | X |
| NSB12 | Drom1829 | Livestock Market, UAE April19 | - | -   | NO CHIP INFO    | neg.           | neg. 3.3          |   |
| NSB13 | Drom1830 | Livestock Market, UAE April19 | F | 4   | 784010050423283 | very weak pos. | neg. 3.5          |   |
| NSB14 | Drom1831 | Livestock Market, UAE April19 | M | 2   | 900111881038113 | neg.           | neg. 3.1          | X |
| NSB16 | Drom1833 | Livestock Market, UAE April19 | F | 4-5 | 634078000075327 | neg.           | pos. 99.4 (1:10)  | X |
| NSB17 | Drom1834 | Livestock Market, UAE April19 | F | 8   | 784010050077291 | neg.           | pos. 150.4        | X |
| NSB18 | Drom1835 | Livestock Market, UAE April19 | F | 2   | 900182001414799 | neg.           | pos. 157.0        | X |
| NSB19 | Drom1836 | Livestock Market, UAE April19 | M | 1   | 991001002575031 | neg.           | pos. 120.7        | X |
| NSB20 | Drom1837 | Livestock Market, UAE April19 | M | 2   | 900111880935178 | neg.           | pos. 152.1        | X |
| NSB21 | Drom1838 | Livestock Market, UAE April19 | M | 3   | 985007841400429 | neg.           | pos. 173.0        | X |
| NSB23 | Drom1840 | Livestock Market, UAE April19 | M | 1   | 991001002570111 | neg.           | neg. 18.1         | X |
| NSB30 | Drom1847 | Livestock Market, UAE April19 | F | 4   | 784010050229794 | neg.           | pos. 166.9        | X |
| NSB31 | Drom1848 | Livestock Market, UAE April19 | F | 6   | 784010050243508 | neg.           | neg. 7.2          | X |
| NSB33 | Drom1850 | Livestock Market, UAE April19 | M | 1-2 | 992001000330620 | neg.           | neg. 24.7         | X |
| NSB34 | Drom1851 | Livestock Market, UAE April19 | F | 2   | 991001002575035 | neg.           | neg. 3.9          | X |
| NSB35 | Drom1852 | Livestock Market, UAE April19 | F | 3   | 991001002574462 | neg.           | neg. 3.2          | X |
| NSB36 | Drom1853 | Livestock Market, UAE April19 | M | 3   | 991001002575745 | neg.           | neg. 3.1          | X |
| NSB37 | Drom1854 | Livestock Market, UAE April19 | M | 2-3 | 992001000330472 | neg.           | neg. 3.0          | X |
| NSB38 | Drom1855 | Livestock Market, UAE April19 | M | 3   | 991001002575920 | neg.           | neg. 3.3          | X |
| NSB39 | Drom1856 | Livestock Market, UAE April19 | F | 6   | 784010050365484 | neg.           | pos. 173.7 (1:10) | X |
| NSB40 | Drom1857 | Livestock Market, UAE April19 | - | 2 m | NO CHIP INFO    | neg.           | neg. 18.3         | X |
| NSB41 | Drom1858 | Livestock Market, UAE April19 | F | 4   | 985007841359958 | neg.           | pos. 187.0        | X |
| NSB42 | Drom1859 | Livestock Market, UAE April19 | F | 4   | 784010050067053 | neg.           | pos. 155.1        | X |
| NSB43 | Drom1860 | Livestock Market, UAE April19 | M | 1-2 | 992001000330719 | neg.           | pos. 124.5        | X |
| NSB44 | Drom1861 | Livestock Market, UAE April19 | F | 6   | 784010050516433 | neg.           | pos. 110.1        | X |
| NSB45 | Drom1862 | Livestock Market, UAE April19 | F | 3   | 784010050028578 | neg.           | pos. 179.3        | X |
| NSB46 | Drom1863 | Livestock Market, UAE April19 | F | 6   | 991001002575819 | neg.           | pos. 173.6        | X |
| NSB47 | Drom1864 | Livestock Market, UAE April19 | M | 3   | 991001002575899 | neg.           | neg. 3.2          | X |
| NSB48 | Drom1865 | Livestock Market, UAE April19 | M | 1-2 | 990001000053606 | neg.           | neg. 3.7          | X |
| NSB49 | Drom1866 | Livestock Market, UAE April19 | F | 3   | 900111881038306 | neg.           | neg. 13.2         | X |

|       |          |                               |   |         |                 |           |            |   |
|-------|----------|-------------------------------|---|---------|-----------------|-----------|------------|---|
| NSB50 | Drom1867 | Livestock Market, UAE April19 | - | 2 m     | NO CHIP INFO    | neg.      | pos. 51.7  | X |
| NSB51 | Drom1868 | Livestock Market, UAE April19 | M | 2       | 991001002574752 | pos. 36.7 | neg. 3.4   |   |
| NSB52 | Drom1869 | Livestock Market, UAE April19 | M | 1-2     | 900074001585559 | neg.      | neg. 24.9  | X |
| NSB54 | Drom1871 | Livestock Market, UAE April19 | F | 5       | 784010050359111 | neg.      | pos. 162.9 | X |
| NSw20 | Drom1872 | Wildlife Reserve, Al Maha     | M | 15      | NO CHIP INFO    | neg       | pos. 173.0 | X |
| NSw21 | Drom1873 | Wildlife Reserve, Al Maha     | M | 13      | NO CHIP INFO    | neg       | pos. 167.0 | X |
| NSw22 | Drom1874 | Wildlife Reserve, Al Maha     | M | 17      | NO CHIP INFO    | neg       | neg. 22.4  | X |
| NSw23 | Drom1875 | Wildlife Reserve, Al Maha     | F | 14      | NO CHIP INFO    | neg       | pos. 170.0 | X |
| NSw25 | Drom1877 | Wildlife Reserve, Al Maha     | M | 9       | NO CHIP INFO    | neg       | pos. 190.4 | X |
| NSw26 | Drom1878 | Wildlife Reserve, Al Maha     | M | 7       | NO CHIP INFO    | neg       | pos. 144.6 | X |
| NSw27 | Drom1879 | Wildlife Reserve, Al Maha     | F | 5       | NO CHIP INFO    | neg       | neg. 3.1   | X |
| NSw30 | Drom1882 | Wildlife Reserve, Al Maha     | F | 14      | NO CHIP INFO    | neg       | pos. 160.9 | X |
| NSw32 | Drom1884 | Wildlife Reserve, Al Maha     | M | 12      | NO CHIP INFO    | neg       | pos. 101.3 | X |
| NSw34 | Drom1886 | Wildlife Reserve, Al Maha     | M | 7       | NO CHIP INFO    | neg       | neg. 18.3  | X |
| NSw35 | Drom1887 | Wildlife Reserve, Al Maha     | M | 2 y 1 m | NO CHIP INFO    | neg       | neg. 3.1   | X |
| NSw38 | Drom1890 | Wildlife Reserve, Alpha       | M | 15      | NO CHIP INFO    | neg       | pos. 152.0 | X |
| NSw40 | Drom1892 | Wildlife Reserve, Travco      | M | 12      | NO CHIP INFO    | neg       | pos. 175.9 | X |
| NSw42 | Drom1893 | Wildlife Reserve, Travco      | M | 9       | NO CHIP INFO    | neg       | pos. 162.8 | X |
| NSw43 | Drom1894 | Wildlife Reserve, ArabAdv     | F | 16      | NO CHIP INFO    | neg       | pos. 121.5 | X |
| NSw46 | Drom1897 | Wildlife Reserve, ArabAdv     | M | 16      | NO CHIP INFO    | neg       | pos. 182.9 | X |
| NSw48 | Drom1899 | Wildlife Reserve, ArabAdv     | M | 12      | NO CHIP INFO    | neg       | pos. 147.0 | X |
| NSw51 | Drom1901 | Wildlife Reserve, ArabAdv     | F | 16      | NO CHIP INFO    | neg       | neg. 26.1  | X |
| NSw52 | Drom1902 | Wildlife Reserve, ArabAdv     | M | 11      | NO CHIP INFO    | neg       | pos. 95.0  | X |
| NSw53 | Drom1903 | Wildlife Reserve, ArabAdv     | F | 2       | NO CHIP INFO    | neg       | neg. 3.6   | X |
| NSw54 | Drom1904 | Wildlife Reserve, ArabAdv     | M | 6       | NO CHIP INFO    | neg       | pos. 40.8  | X |
| NSw55 | Drom1905 | Wildlife Reserve, ArabAdv     | F | 18      | NO CHIP INFO    | neg       | pos. 170.2 | X |
| NSw56 | Drom1906 | Wildlife Reserve, ArabAdv     | F | 6 m     | NO CHIP INFO    | neg       | pos. 86.5  | X |
| NSw57 | Drom1907 | Wildlife Reserve, DesertStar  | M | 8-9     | NO CHIP INFO    | neg       | pos. 152.2 | X |
| NSw59 | Drom1909 | Wildlife Reserve, DesertStar  | M | 5       | NO CHIP INFO    | neg       | neg. 3.4   | X |
| NSw60 | Drom1910 | Wildlife Reserve, DesertStar  | M | 5       | NO CHIP INFO    | neg       | pos. 133.8 | X |
| NSw63 | Drom1913 | Wildlife Reserve, DesertStar  | M | 15      | NO CHIP INFO    | neg       | pos. 172.0 | X |
| w67   | Drom1917 | Wildlife Reserve, DesertStar  | M | 18      | NO CHIP INFO    | neg       | pos. 122.2 | X |
| w69   | Drom1919 | Wildlife Reserve, DesertStar  | M | 18      | NO CHIP INFO    | neg       | pos. 250.4 | X |
| w79   | Drom1928 | Wildlife Reserve, DesertStar  | M | 7       | NO CHIP INFO    | neg       | pos. 224.2 | X |
| M1    | Drom1929 | Bedouin farm, Al Mazrooei     | F | 4       | NO CHIP INFO    | neg       | neg. 5.9   | X |
| M2    | Drom1930 | Bedouin farm, Al Mazrooei     | F | 4       | NO CHIP INFO    | neg       | neg. 5.5   | X |
| M3    | Drom1931 | Bedouin farm, Al Mazrooei     | F | 4       | NO CHIP INFO    | neg       | pos. 226.8 | X |
| M4    | Drom1932 | Bedouin farm, Al Mazrooei     | F | 15      | NO CHIP INFO    | neg       | pos. 235.1 | X |
| M5    | Drom1933 | Bedouin farm, Al Mazrooei     | F | 8       | NO CHIP INFO    | neg       | pos. 86.9  | X |
| M6    | Drom1934 | Bedouin farm, Al Mazrooei     | F | 25-30   | NO CHIP INFO    | neg       | pos. 152.9 | X |
| M7    | Drom1935 | Bedouin farm, Al Mazrooei     | F | 5       | NO CHIP INFO    | neg       | neg. 5.9   | X |



|     |          |                           |   |     |              |     |            |   |
|-----|----------|---------------------------|---|-----|--------------|-----|------------|---|
| M8  | Drom1936 | Bedouin farm, Al Mazrooei | F | 12  | NO CHIP INFO | neg | pos. 70.3  | X |
| M9  | Drom1937 | Bedouin farm, Al Mazrooei | F | 12  | NO CHIP INFO | neg | pos. 113.6 | X |
| M10 | Drom1938 | Bedouin farm, Al Mazrooei | F | 12  | NO CHIP INFO | neg | pos. 244.1 | X |
| M11 | Drom1939 | Bedouin farm, Al Mazrooei | F | 14  | NO CHIP INFO | neg | pos. 188.0 | X |
| M12 | Drom1940 | Bedouin farm, Al Mazrooei | M | 2 m | NO CHIP INFO | neg | pos. 120.8 | X |
| M13 | Drom1941 | Bedouin farm, Al Mazrooei | M | 10  | NO CHIP INFO | neg | pos. 196.4 | X |
| M14 | Drom1942 | Bedouin farm, Al Mazrooei | M | 14  | NO CHIP INFO | neg | pos. 167.1 | X |
| M15 | Drom1943 | Bedouin farm, Al Mazrooei | F | 10  | NO CHIP INFO | neg | pos. 151.7 | X |

**Table S2. List of 100 selected IR genes.**

| Gene ID             | Genes-No.SNPs | Name       | Description                                                                                         |
|---------------------|---------------|------------|-----------------------------------------------------------------------------------------------------|
| <b>MHC Class I</b>  |               |            |                                                                                                     |
| Cadr_00022140       | 112           | HLA-A-24   | HLA class I histocompatibility antigen, A-24 alpha chain (Homo sapiens OX=9606)                     |
| Cadr_00022145       | 30            | HLA-A-11   | HLA class I histocompatibility antigen, A-11 alpha chain (Homo sapiens OX=9606)                     |
| Cadr_00022149       | 14            | HLA-A-69   | HLA class I histocompatibility antigen, A-69 alpha chain (Homo sapiens OX=9606)                     |
| Cadr_00022150       | 134           | HLA-A-30   | HLA class I histocompatibility antigen, A-30 alpha chain (Homo sapiens OX=9606)                     |
| Cadr_00022148       | 20            | HLA-C      | HLA class I histocompatibility antigen, Cw-6 alpha chain (Homo sapiens OX=9606)                     |
| Cadr_00022156       | 4             | Patr       | class I histocompatibility B-1 alpha chain (Fragment) (Pan troglodytes OX=9598)                     |
| Cadr_00022105       | 18            | Patr-A-126 | Patr class I histocompatibility antigen, A-126 alpha chain (Pan troglodytes OX=9598)                |
| Cadr_00022139       | 67            | Patr-A-126 | Patr class I histocompatibility antigen, A-126 alpha chain (Pan troglodytes OX=9598)                |
| Cadr_00022147       | 5             | Patr-A-126 | Patr class I histocompatibility antigen, A-126 alpha chain (Pan troglodytes OX=9598)                |
| Cadr_00022160       | 31            | Patr-A-126 | Patr class I histocompatibility antigen, A-126 alpha chain (Pan troglodytes OX=9598)                |
| Cadr_00022155       | 0             | Popy       | class I histocompatibility antigen A-1 alpha chain (Pongo pygmaeus OX=9600)                         |
| <b>MHC Class II</b> |               |            |                                                                                                     |
| Cadr_00022027       | 28            | BoLA-DQB   | BoLa class II histocompatibility antigen, DQB*0101 beta chain (Bos taurus OX=9913)                  |
| Cadr_00004894       | 11            | CD74       | HLA class II histocompatibility antigen gamma chain (Homo sapiens OX=9606)                          |
| Cadr_00022030       | 95            | DLA        | class II histocompatibility antigen, DR-1 beta chain (Canis lupus familiaris OX=9615)               |
| Cadr_00022020       | 5             | HLA-DMA    | HLA class II histocompatibility antigen, DM alpha chain (Homo sapiens OX=9606)                      |
| Cadr_00022021       | 33            | HLA-DMB    | HLA class II histocompatibility antigen, DM alpha chain (Homo sapiens OX=9606)                      |
| Cadr_00022018       | 25            | HLA-DOA    | HLA class II histocompatibility antigen, DO alpha chain (Homo sapiens OX=9606)                      |
| Cadr_00022026       | 72            | HLA-DOB    | HLA class II histocompatibility antigen, DO alpha chain (Homo sapiens OX=9606)                      |
| Cadr_00022017       | 32            | HLA-DPA1   | HLA class II histocompatibility antigen, DP alpha chain (Homo sapiens OX=9606)                      |
| Cadr_00022016       | 41            | HLA-DPB1   | HLA class II histocompatibility antigen, DP alpha chain (Homo sapiens OX=9606)                      |
| Cadr_00022036       | 89            | HLA-DRB1   | HLA class II histocompatibility antigen, DRB1-4 alpha chain (Homo sapiens OX=9606)                  |
| Cadr_00022037       | 63            | HLA-DRB1   | HLA class II histocompatibility antigen, DRB1-1 alpha chain (Homo sapiens OX=9606)                  |
| Cadr_00022038       | 34            | Mamu-DRA   | Mamu class II histocompatibility antigen, DR alpha chain (Macac mulata OX=9544)                     |
| Cadr_00022032       | 7             | RT1-Bb     | Rano class II histocompatibility antigen, B-1 beta chain (Rattus norvegicus OX=10116)               |
| Cadr_00022034       | 36            | RT1-Bb     | Rano class II histocompatibility antigen, B-1 beta chain (Rattus norvegicus OX=10116)               |
| Cadr_00022028       | 15            | SLA        | class II histocompatibility antigen, DQ haplotype D alpha chain (Sus scrofa =X=9823)                |
| Cadr_00022033       | 6             | SLA        | class II histocompatibility antigen, DQ haplotype D alpha chain (Sus scrofa =X=9823)                |
| Cadr_00022035       | 4             | SLA        | class II histocompatibility antigen, DQ haplotype D alpha chain (Sus scrofa =X=9823)                |
| <b>TLR</b>          |               |            |                                                                                                     |
| Cadr_00002152       | 5             | TLR1       | Toll-like receptor 1 (Homo sapiens OX=9606)                                                         |
| Cadr_00002153       | 23            | TLR10      | Toll-like receptor 10 (Bos taurus OX=9913)                                                          |
| Cadr_00001385       | 10            | TLR2       | Toll-like receptor 2 (Equus caballus OX=9796)                                                       |
| Cadr_00026583       | 31            | TLR3       | Toll-like receptor 3 (Boselaphus tragocamelus OX=9917)                                              |
| Cadr_00016120       | 8             | TLR4       | Toll-like receptor 4 (Sus scrofa OX=9823)                                                           |
| Cadr_00023195       | 4             | TLR5       | Toll-like receptor 5 (Homo sapiens OX=9606)                                                         |
| Cadr_00002151       | 15            | TLR6       | Toll-like receptor 6 (Homo sapiens OX=9606)                                                         |
| Cadr_00003728       | 18            | TLR7       | Toll-like receptor 7 (Homo sapiens OX=9606)                                                         |
| Cadr_00003726       | 7             | TLR8       | Toll-like receptor 8 (Homo sapiens OX=9606)                                                         |
| Cadr_00020415       | 3             | TLR9       | Toll-like receptor 9 (Sus scrofa OX=9823)                                                           |
| <b>Granzyme</b>     |               |            |                                                                                                     |
| Cadr_00004168       | 4             | GZMA       | Granzyme A (Bos taurus OX=9913)                                                                     |
| Cadr_00004169       | 1             | GZMA       | Granzyme A (Homo sapiens OX=9606)                                                                   |
| Cadr_00005822       | 0             | GZMB       | Granzyme B (Homo sapiens OX=9606)                                                                   |
| Cadr_00005823       | 22            | GZMB       | Granzyme B (Homo sapiens OX=9606)                                                                   |
| Cadr_00005821       | 5             | GZMH       | Granzyme H (Homo sapiens OX=9606)                                                                   |
| Cadr_00004167       | 6             | GZMK       | Granzyme K (Homo sapiens OX=9606)                                                                   |
| Cadr_00025032       | 16            | GZMM       | Granzyme M (Homo sapiens OX=9606)                                                                   |
| <b>Interleukin</b>  |               |            |                                                                                                     |
| Cadr_00001885       | 3             | CXCL8      | Interleukin-8 (Canis lupus familiaris OX=9615)                                                      |
| Cadr_00023412       | 7             | IL10       | Interleukin-10 (Lama glama OX=9844)                                                                 |
| Cadr_00028914       | 14            | IL10RA     | Interleukin-10 receptor subunit alpha (Homo sapiens OX=9606)                                        |
| Cadr_00001098       | 61            | IL10RB     | Interleukin-10 receptor subunit alpha (Homo sapiens OX=9606)                                        |
| Cadr_00029940       | 16            | IL1A       | Interleukin-1 alpha (Lama glama OX=9844)                                                            |
| Cadr_00029941       | 20            | IL1B       | Interleukin-1 beta (Lama glama OX=9844)                                                             |
| <b>Killer cell</b>  |               |            |                                                                                                     |
| Cadr_00029273       | 19            | Klra2      | Killer cell lectin-like receptor 2 (Mus musculus OX=10090)                                          |
| Cadr_00029303       | 4             | KLRB1      | Killer cell lectin-like receptor subfamily B member 1 (Homo sapiens OX=9606)                        |
| Cadr_00029300       | 2             | Klrb1b     | Killer cell lectin-like receptor subfamily B member 1B allele A (Camelus bactrianus XP_010944886.1) |
| Cadr_00029489       | 18            | KLRC2      | NKG2-C type II integral membrane protein (Homo sapiens OX=9606)                                     |
| Cadr_00029281       | 10            | KLRD1      | Natural killer cells antigen CD94 (Bos taurus OX=9913)                                              |
| Cadr_00029283       | 13            | Klre1      | Killer cell lectin-like receptor subfamily E member 1 (Mus musculus OX=10090)                       |

|                    |     |          |                                                                                                      |
|--------------------|-----|----------|------------------------------------------------------------------------------------------------------|
| Cadr_00029297      | 73  | KLRF1    | Killer cell lectin-like receptor subfamily F member 1 (Macaca fascicularis OX=9541)                  |
| Cadr_00029295      | 48  | KLRF2    | Killer cell lectin-like receptor subfamily F member 2 (Homo sapiens OX=9606)                         |
| Cadr_00008447      | 42  | Klrg2    | Killer cell lectin-like receptor subfamily G member 2 (Mus musculus OX=10090)                        |
| Cadr_00029277      | 28  | Klri1    | Killer cell lectin-like receptor subfamily I member 1 (Mus musculus OX=10090)                        |
| Cadr_00029276      | 11  | KLRK1    | NKG2-D type II integral membrane protein (Pongo Pygmaeus OX=9600)                                    |
| Cadr_00029279      | 14  | KLRK1    | NKG2-D type II integral membrane protein (Sus scrofa OX=9823)                                        |
| <b>Other genes</b> |     |          |                                                                                                      |
| Cadr_00030052      | 11  | ACO1     | Cytoplasmic aconitate hydratase (Bos taurus OX=9913)                                                 |
| Cadr_00020478      | 5   | APPL1    | DCC-interacting protein 13-alpha (Homo sapiens OX=9606)                                              |
| Cadr_00002239      | 297 | CC2D2A   | Coiled-coil and C2 domain-containing protein 2A (Homo sapiens OX=9606)                               |
| Cadr_00029296      | 27  | CLEC2B   | C-type lectin domain family 2 member B (Homo sapiens OX=9606)                                        |
| Cadr_00007342      | 11  | CXCR2    | C-X-C chemokine receptor type 2 (Bos taurus OX=9913)                                                 |
| Cadr_00030053      | 90  | DDX58    | Probable ATP-dependent RNA helicase DDX58 (Sus scrofa OX=9823)                                       |
| Cadr_00020479      | 129 | DNAH7    | Dynein heavy chain 7 axonemal (Homo sapiens OX=9607)                                                 |
| Cadr_00006877      | 64  | DPP4     | Dipeptidyl peptidase 4 (Bos taurus OX=9913)                                                          |
| Cadr_00012213      | 12  | FCAR     | Immunoglobulin alpha Fc receptor (Homo sapiens OX=9606)                                              |
| Cadr_00024638      | 47  | FCRL3    | Fc receptor-like protein 3 (Homo sapiens OX=9606)                                                    |
| Cadr_00011189      | 2   | HP       | Haptoglobin (Sus scrofa OX=9823)                                                                     |
| Cadr_00006880      | 29  | IFIH1    | Interferon-induced helicase C domain-containing protein 1 (Homo sapiens OX=9606)                     |
| Cadr_00015578      | 0   | IFNB2    | Interferon beta-2 (Bos taurus OX=9913)                                                               |
| Cadr_00017035      | 3   | IFNG     | Interferon gamma (Camelus bactrianus OX=9837)                                                        |
| Cadr_00001103      | 50  | IFNGR2   | Interferon gamma receptor 2 (Homo sapiens OX=9606)                                                   |
| Cadr_00029272      | 12  | MAGOHB   | Protein mago nashi homolog 2 (Bos taurus OX=9913)                                                    |
| Cadr_00004186      | 13  | MAP3K1   | Mitogen-activated protein kinase kinase kinase 1 (Homo sapiens OX=9606)                              |
| Cadr_00005819      | 1   | Mast     | cell protease 3 (Ovis aries OX=9940)                                                                 |
| Cadr_00012215      | 15  | NCR1     | Natural cytotoxicity triggering receptor 1 (Bos taurus OX=9913)                                      |
| Cadr_00021869      | 9   | NCR2     | Natural cytotoxicity triggering receptor 2 (Homo sapiens OX=9606)                                    |
| Cadr_00001692      | 77  | NFKB1    | Nuclear factor NF-kappa-B p105 subunit (Canis lupus familiaris OX=9615)                              |
| Cadr_00009474      | 6   | NFKB2    | Nuclear factor NF-kappa-B p100 subunit (Homo sapiens OX=9606)                                        |
| Cadr_00029278      | 15  | NKG2A    | NKG2-A/NKG2-B type II integral membrane protein (Macaca mulatta OX=9544)                             |
| Cadr_00029993      | 12  | NKL      | Antimicrobial peptide NK-lysin (Fragment) (Sus scrofa OX=9823)                                       |
| Cadr_00009139      | 6   | PRF1     | Perforin-1 (Homo sapiens OX=9606)                                                                    |
| Cadr_00007027      | 22  | PRKRA    | Interferon-inducible double-stranded RNA dependent protein kinase activator A (Homo sapiens OX=9606) |
| Cadr_00009475      | 0   | Psd      | PH and SEC7 domain-containing protein 1 (Mus musculus OX=10090)                                      |
| Cadr_00024639      | 2   | PTMA     | Prothymosin alpha (Pongo abelii OX=9601)                                                             |
| Cadr_00006681      | 163 | PTPN4    | Tyrosine-protein phosphatase non-receptor type 4 (Homo sapiens OX=9606)                              |
| Cadr_00001384      | 10  | RNF175   | RING finger protein 175 (Homo sapiens OX=9606)                                                       |
| Cadr_00004895      | 4   | Rps14    | 40S ribosomal protein S14 (Mus musculus OX=10090)                                                    |
| Cadr_00017710      | 6   | Rps7     | 40S ribosomal protein S7 (Rattus norvegicus OX=10116)                                                |
| Cadr_00001327      | 32  | Suclg1   | Succinate--CoA ligase [ADP/GDP-forming] subunit alpha, mitochondrial (Mus musculus OX=10090)         |
| Cadr_00002785      | 18  | Tmem255a | Transmembrane protein 255A (Mus musculus OX=10090)                                                   |
| Cadr_00022101      | 7   | TNF      | Tumor necrosis factor (Camelus bactrianus OX=9837)                                                   |
| Cadr_00006503      | 45  | Traf3    | TNF receptor-associated factor 3 (Mus musculus OX=10090)                                             |
| Cadr_00011190      | 1   | TXNL4B   | Thioredoxin-like protein 4B (Homo sapiens OX=9606)                                                   |

**Table S3. Potential splice sites in the *FCAR* and *CLEC2B* gene identified with NatGene2 v.2.42.** Positions follow the CamDro3 reference genome (GCF\_000803125.2). Cut-off values used for confidence: Highly confident donor sites (H): 95.0%. The closest splice sites to significant SNPs (Table 1; Figure S2) are highlighted in bold.

| <b><i>FCAR</i> (chr9: 73807328 - 73825701)</b> |          |          |             |                                |
|------------------------------------------------|----------|----------|-------------|--------------------------------|
| Donor splice sites, direct strand (pos 5'→3')  | phase    | strand   | confidence  | 5' exon^intron 3'              |
| 73807601                                       | 1        | +        | 0.88        | TCCAACACCG^GTGAGTACAG          |
| 73809007                                       | 1        | +        | 0.45        | CAAGATGAAC^GTAGGGAGAC          |
| 73809252                                       | 0        | +        | 0.34        | GTGGGTGGAC^GTAAGATGTG          |
| 73809567                                       | 1        | +        | 0.44        | TGAAGACGAG^GTCAGACCAG          |
| 73809735                                       | 0        | +        | 0.47        | CACCTGGGAG^GTGAATACCA          |
| 73809757                                       | 1        | +        | 0.55        | ATTCTTCTGA^GTGAGTTCAG          |
| 73810248                                       | 1        | +        | 0.94        | GCCAAAAAGA^GTAAGTCTCA H        |
| 73810301                                       | 0        | +        | 0.31        | GGGAGGTGGG^GTGAGGGTGC          |
| 73810315                                       | 0        | +        | 0.41        | GGGTGCGCAG^GTGTGTGTCC          |
| 73810569                                       | 0        | +        | 0.34        | CTTCAAAGAG^GTAAAATTC           |
| 73810756                                       | 0        | +        | 0.77        | GAACAGGGCG^GTAGGTTCTC          |
| 73811382                                       | 1        | +        | 0.46        | TTCTATAGAG^GTACGGCGTC          |
| 73812004                                       | 0        | +        | 0.44        | TCCATCTTCA^GTGAGTGAGC          |
| 73812707                                       | 1        | +        | 0.65        | TATCATTGAG^GTAATTTTCA          |
| 73813597                                       | 2        | +        | 0.45        | AGAGACACCT^GTAAGCCCTG          |
| 73813900                                       | 0        | +        | 0.92        | AGCATCGCTG^GTGAGCAGCA H        |
| 73814220                                       | 0        | +        | 0.47        | TGGGGACAAG^GTGAGACTCT          |
| 73814382                                       | 0        | +        | 0.3         | CAACCAGCGC^GTGAGGCAGT          |
| 73814631                                       | 0        | +        | 0.83        | GAAGCTAGAG^GTAAGACAAG          |
| 73814706                                       | 0        | +        | 0.34        | ATATGACAAG^GTACTTTCTT          |
| 73815102                                       | 1        | +        | 0.82        | GTTGCCCACT^GTGAGTCATT          |
| 73815812                                       | 0        | +        | 0.42        | TATCTCTGAG^GTCAGTGGGT          |
| 73815987                                       | 1        | +        | 0.63        | ACTGCTCACG^GTGAGTGGAT          |
| 73817375                                       | 2        | +        | 0.32        | ATATATGAAG^GTTGGTGAAA          |
| 73817612                                       | 0        | +        | 0.49        | GTACAGCATG^GTGAGTAGAA          |
| 73818627                                       | 1        | +        | 0.93        | TTCTGCCTTG^GTGAGTCTG H         |
| 73819125                                       | 1        | +        | 0.81        | GCACAGGATG^GTAAGCATTC          |
| 73820437                                       | 0        | +        | 0.34        | GGAAGGAACT^GTAAGTCCTT          |
| <b>73820819</b>                                | <b>1</b> | <b>+</b> | <b>0.91</b> | <b>GTGGTGACAG^GTGCGGAGGC H</b> |
| 73821287                                       | 2        | +        | 0.56        | TCAACCACTC^GTGAGTTTAT          |
| 73821306                                       | 0        | +        | 0.47        | TGTTAATGTG^GTGAGTTTGT          |

|          |   |   |      |                         |
|----------|---|---|------|-------------------------|
| 73822423 | 1 | + | 1    | GTGGTCACAG^GTAAGGGCAC H |
| 73823183 | 1 | + | 0.56 | CAGTGCCAAG^GTAATCTGCT   |
| 73824511 | 0 | + | 0.41 | GTTCCGTGAC^GTAAGTCTGC   |
| 73825185 | 0 | + | 0.34 | GAACACACCT^GTGAGTGACA   |
| 73825399 | 1 | + | 0.46 | ACACTGAATA^GTAAGTACAT   |
| 73825617 | 1 | + | 0.00 | CTCAGAAATG^GTATGATTTG   |

**CLEC2B (chr34: 15807876 - 15823606)**

| Donor splice sites, direct strand (pos 5'→3') | phase    | strand   | confidence  | 5' exon^intron 3'              |
|-----------------------------------------------|----------|----------|-------------|--------------------------------|
| 15808104                                      | 0        | +        | 0.31        | GGAACCCAGG^GTACCAGGGG          |
| <b>15808984</b>                               | <b>1</b> | <b>+</b> | <b>0.99</b> | <b>AAGAAGGAAG^GTAAGAACAT H</b> |
| 15809097                                      | 0        | +        | 0.37        | TTCTACCAAG^GTGGGGGGGG          |
| 15809635                                      | 1        | +        | 0.47        | TTCAGAGTAG^GTAAGATCCA          |
| 15809711                                      | 0        | +        | 0.37        | TCAAAATAGG^GTGAGGCAGG          |
| 15809776                                      | 1        | +        | 0.44        | GGGGGCTATG^GTGAGTTTTA          |
| 15809915                                      | 0        | +        | 0.35        | TCTGTCTAAG^GTTAGATCAA          |
| 15812452                                      | 1        | +        | 0.32        | TATGTCAAAG^GTGGGGTGGA          |
| 15813041                                      | 1        | +        | 0.37        | AAAAAAAAAG^GTGACTTGTC          |
| 15813559                                      | 1        | +        | 0.34        | AAGGACACAT^GTAAGAAGTA          |
| 15813634                                      | 1        | +        | 0.54        | GTTCTCCAAG^GTGAGTACAT          |
| 15813936                                      | 1        | +        | 0.47        | ATTGCCAAAG^GTTAGTTTTG          |
| 15814738                                      | 2        | +        | 0.41        | TGATGACTGA^GTGAGTGTGT          |
| 15816556                                      | 0        | +        | 1           | AGAAAAGATG^GTAAGTAATT H        |
| 15816990                                      | 2        | +        | 0.46        | ATGTGTCCCT^GTAAGTTTCC          |
| 15817564                                      | 1        | +        | 0.32        | GAAAACTAG^GTATAGAGCA           |
| 15819286                                      | 0        | +        | 0.7         | GGCTCAGAGG^GTAAATGCT           |
| 15819547                                      | 1        | +        | 0.81        | TTAAGAATTG^GTGAGTTTCT          |
| 15820366                                      | 0        | +        | 0.36        | GTAACTTTAT^GTAAGTTTAA          |
| 15820700                                      | 1        | +        | 0.7         | AAAACTATGA^GTAAGATGGT          |
| 15822616                                      | 1        | +        | 0.37        | GGAAGAAAGG^GTGTGTGGGC          |

**Table S4. Linkage Disequilibrium-based haplotype (gene-set) test showing 40 genes with significant SNPs at  $p < 0.05$ .** Identified candidate gene FCAR was nominally significant ( $p < 0.01$ ) indicated with \*. NSNP - Number of SNPs in set; NSIG - Total number of SNPs below  $p$ -value threshold; ISIG - Number of significant SNPs also passing LD-criterion; STAT - Average test statistic based on ISIG SNPs; EMP1 - Empirical set-based  $p$ -value; SNPs - positions of SNPs in the set.

| SET           | NSNP | NSIG | ISIG | EMP1    | SNPs                                            | Name       |
|---------------|------|------|------|---------|-------------------------------------------------|------------|
| Cadr_00012213 | 12   | 9    | 1    | 0.0031* | 9_73819886                                      | FCAR       |
| Cadr_00006880 | 29   | 17   | 1    | 0.0126  | 5_36852218                                      | IFIH1      |
| Cadr_00029278 | 15   | 12   | 1    | 0.01365 | 34_15453059                                     | NKG2A      |
| Cadr_00025032 | 15   | 1    | 1    | 0.0197  | 22_299371                                       | GZMM       |
| Cadr_00022016 | 41   | 9    | 1    | 0.0221  | 20_20681619                                     | HLA-DPB1   |
| Cadr_00006681 | 162  | 2    | 2    | 0.0254  | 5_8524970 5_8553067                             | PTPN4      |
| Cadr_00017035 | 3    | 1    | 1    | 0.0281  | 12_24456808                                     | IFNG       |
| Cadr_00001327 | 32   | 1    | 1    | 0.0486  | 2_5563103                                       | Suclg1     |
| Cadr_00029276 | 11   | 1    | 1    | 0.05214 | 34_15423950                                     | KLRK1      |
| Cadr_00029277 | 28   | 17   | 3    | 0.05869 | 34_15447536 34_15432256 34_15441877             | Klri1      |
| Cadr_00022020 | 5    | 1    | 1    | 0.06124 | 20_20736642                                     | HLA-DMA    |
| Cadr_00009474 | 6    | 1    | 1    | 0.07274 | 11_60541518                                     | NFKB2      |
| Cadr_00022160 | 25   | 2    | 1    | 0.08034 | 20_23402080                                     | Patr-A-126 |
| Cadr_00022033 | 2    | 2    | 1    | 0.08489 | 20_20924560                                     | SLA-DQS    |
| Cadr_00022017 | 31   | 2    | 2    | 0.09119 | 20_20688614 20_20690464                         | HLA-DPA1   |
| Cadr_00022030 | 95   | 2    | 1    | 0.09369 | 20_20871804                                     | DLA-DR1    |
| Cadr_00029273 | 19   | 5    | 3    | 0.1026  | 34_15379486 34_15372199 34_15371765             | Klra2      |
| Cadr_00022018 | 25   | 4    | 2    | 0.1056  | 20_20701339 20_20701643                         | HLA-DOA    |
| Cadr_00007027 | 22   | 4    | 1    | 0.1096  | 5_49754009                                      | PRKRA      |
| Cadr_00028914 | 14   | 7    | 2    | 0.1155  | 33_12221507 33_12212516                         | IL10RA     |
| Cadr_00029297 | 73   | 4    | 1    | 0.1157  | 34_15833105                                     | KLRF1      |
| Cadr_00022021 | 33   | 5    | 2    | 0.142   | 20_20746290 20_20745925                         | HLA-DMB    |
| Cadr_00029489 | 18   | 10   | 1    | 0.1641  | 34_22473182                                     | KLRC2      |
| Cadr_00001103 | 49   | 9    | 2    | 0.184   | 1_113858111 1_113864038                         | IFNGR2     |
| Cadr_00030053 | 89   | 3    | 3    | 0.2045  | Contig45_329479 Contig45_327196 Contig45_324930 | DDX58      |
| Cadr_00004894 | 11   | 1    | 1    | 0.2159  | 3_109719975                                     | CD74       |
| Cadr_00022139 | 67   | 9    | 1    | 0.2391  | 20_23039666                                     | Patr-A-126 |
| Cadr_00022026 | 72   | 8    | 1    | 0.2518  | 20_20828643                                     | HLA-DOB    |
| Cadr_00022150 | 128  | 12   | 2    | 0.2689  | 20_23268542 20_23270977                         | HLA-A-30   |
| Cadr_00022027 | 28   | 1    | 1    | 0.2763  | 20_20838772                                     | BoLA-DQB   |
| Cadr_00022148 | 20   | 3    | 1    | 0.2962  | 20_23247823                                     | HLA-Cw6    |
| Cadr_00022038 | 34   | 1    | 1    | 0.3012  | 20_21060760                                     | Mamu-DRA   |
| Cadr_00029272 | 12   | 1    | 1    | 0.3017  | 34_15363470                                     | MAGOHB     |
| Cadr_00020479 | 127  | 2    | 1    | 0.3147  | 17_23843066                                     | DNAH7      |
| Cadr_00002153 | 23   | 3    | 2    | 0.3245  | 2_95082961 2_95084365                           | TLR10      |
| Cadr_00006877 | 64   | 6    | 1    | 0.3928  | 5_36650034                                      | DPP4       |
| Cadr_00022149 | 14   | 2    | 1    | 0.4345  | 20_23254824                                     | HLA-A-69   |
| Cadr_00024638 | 47   | 4    | 2    | 0.4364  | 21_21451949 21_21438740                         | FCRL3      |

|               |     |   |   |        |                         |          |
|---------------|-----|---|---|--------|-------------------------|----------|
| Cadr_00001692 | 76  | 2 | 2 | 0.4563 | 2_49863272 2_49851559   | NFKB1    |
| Cadr_00022140 | 110 | 3 | 2 | 0.6527 | 20_23101931 20_23103971 | HLA-A-24 |

---
